# Supplementary material
Source: HighWire-hosted journal article supplement (https://www.cmaj.ca/highwire/filestream/59124/field_highwire_adjunct_files/0/decision-redditt-1-at.pdf)
Supplement: decision-redditt-1-at.pdf [file decision-redditt-1-at.pdf]

**Appendix 1: Risk factors for the development of active tuberculosis among people with a positive tuberculin skin test (presumed infected with *Mycobacterium tuberculosis*)**

| Risk factor                                                                                                                                                                                                                                                                                                                                                                                                                                                            | Estimated risk for TB relative to people with no known risk factor* |
|------------------------------------------------------------------------------------------------------------------------------------------------------------------------------------------------------------------------------------------------------------------------------------------------------------------------------------------------------------------------------------------------------------------------------------------------------------------------|---------------------------------------------------------------------|
| <b>High risk:</b>                                                                                                                                                                                                                                                                                                                                                                                                                                                      |                                                                     |
| • Acquired immunodeficiency syndrome                                                                                                                                                                                                                                                                                                                                                                                                                                   | 110–170                                                             |
| • Human immunodeficiency virus infection                                                                                                                                                                                                                                                                                                                                                                                                                               | 50–110                                                              |
| • Transplantation (related to immune-suppressant therapy)                                                                                                                                                                                                                                                                                                                                                                                                              | 20–74                                                               |
| • Silicosis                                                                                                                                                                                                                                                                                                                                                                                                                                                            | 30                                                                  |
| • Chronic renal failure requiring hemodialysis                                                                                                                                                                                                                                                                                                                                                                                                                         | 7–50                                                                |
| • Carcinoma of head and neck                                                                                                                                                                                                                                                                                                                                                                                                                                           | 11.6                                                                |
| • Recent TB infection ( $\leq 2$ yr)                                                                                                                                                                                                                                                                                                                                                                                                                                   | 15.0                                                                |
| • Abnormal chest x-ray — fibronodular disease                                                                                                                                                                                                                                                                                                                                                                                                                          | 6–19                                                                |
| <b>Moderate risk:</b>                                                                                                                                                                                                                                                                                                                                                                                                                                                  |                                                                     |
| • Tumour necrosis factor alpha inhibitors                                                                                                                                                                                                                                                                                                                                                                                                                              | 1.5–5.8                                                             |
| • Diabetes mellitus (all types)                                                                                                                                                                                                                                                                                                                                                                                                                                        | 2–3.6                                                               |
| • Treatment with glucocorticoids ( $\geq 15$ mg/d prednisone)                                                                                                                                                                                                                                                                                                                                                                                                          | 4.9                                                                 |
| • Young age when infected (0–4 years)                                                                                                                                                                                                                                                                                                                                                                                                                                  | 2.2–5                                                               |
| <b>Slightly increased risk:</b>                                                                                                                                                                                                                                                                                                                                                                                                                                        |                                                                     |
| • Heavy alcohol consumption ( $\geq 3$ drinks/day)                                                                                                                                                                                                                                                                                                                                                                                                                     | 3–4                                                                 |
| • Underweight ( $< 90\%$ ideal body weight; for most people, this is a body mass index $\leq 20$ )                                                                                                                                                                                                                                                                                                                                                                     | 2–3                                                                 |
| • Cigarette smoker (1 pack/d)                                                                                                                                                                                                                                                                                                                                                                                                                                          | 1.8–3.5                                                             |
| • Abnormal chest x-ray — granuloma                                                                                                                                                                                                                                                                                                                                                                                                                                     | 2                                                                   |
| <b>Low risk:</b>                                                                                                                                                                                                                                                                                                                                                                                                                                                       |                                                                     |
| • Person with positive TST, no known risk factor, normal chest x-ray (“low risk reactor”)                                                                                                                                                                                                                                                                                                                                                                              | 1                                                                   |
| <b>Very low risk:</b>                                                                                                                                                                                                                                                                                                                                                                                                                                                  |                                                                     |
| • Person with positive two-step TST (booster), no other known risk factor and normal chest x-ray                                                                                                                                                                                                                                                                                                                                                                       | 0.5                                                                 |
| <p>TB = tuberculosis, TST = tuberculin skin test.<br/>                     *Full references for the estimated risk ranges can be found in the <i>Canadian Tuberculosis Standards, 7th Edition</i>.<br/>                     ©All Rights Reserved. <i>Canadian Tuberculosis Standards, 7th Edition</i>. The Canadian Thoracic Society (CTS) of the Canadian Lung Association (CLA) and the Public Health Agency of Canada (PHAC), 2013. Reproduced with permission.</p> |                                                                     |
